# Supplementary material
Source: HighWire-hosted journal article supplement (https://bmjopen.bmj.com/content/12/6/e059673)
Supplement: inline-supplementary-material-1 [file inline-supplementary-material-1.pdf]

## APPENDIX

**Table 1a.** Association between gender-related variables and adoption of hand washing, by sex

|                                                   | Hand washing          |         |                           |         |                       |         |                           |         |
|---------------------------------------------------|-----------------------|---------|---------------------------|---------|-----------------------|---------|---------------------------|---------|
|                                                   | Female                |         |                           |         | Male                  |         |                           |         |
|                                                   | Bivariate OR (95% CI) | p-value | Multivariate aOR (95% CI) | p-value | Bivariate OR (95% CI) | p-value | Multivariate aOR (95% CI) | p-value |
| <b>Sociodemographic characteristics</b>           |                       |         |                           |         |                       |         |                           |         |
| <b>Age distribution</b>                           |                       |         |                           |         |                       |         |                           |         |
| • Up to 25 (ref)                                  | -                     |         | -                         |         | -                     |         | -                         |         |
| • 26-50                                           | 2.91 (2.37-3.58)      | <0.001  | 4.44 (1.68-11.76)         | <0.01   | 2.45 (1.91-3.14)      | <0.001  | 1.89 (0.63-5.68)          | 0.25    |
| • 51 and older                                    | 7.71 (5.57-10.66)     | <0.001  | 13.39 (2.87-62.6)         | <0.01   | 4.56 (3.36-6.18)      | <0.001  | 2.25 (0.81-6.27)          | 0.11    |
| <b>Education level</b>                            |                       |         |                           |         |                       |         |                           |         |
| • Low level (ref)                                 | -                     |         | -                         |         | -                     |         | -                         |         |
| • High level                                      | 1.63 (1.29-2.07)      | <0.001  | 0.78 (0.32-1.91)          | 0.58    | 1.47 (1.12-1.92)      | <0.01   | 0.37 (0.14-1.01)          | 0.05    |
| <b>Work status</b>                                |                       |         |                           |         |                       |         |                           |         |
| • Unemployed (ref)                                | -                     |         | -                         |         | -                     |         | -                         |         |
| • Employed                                        | 2.41 (1.35-4.28)      | <0.01   | 1.19 (0.50-2.83)          | 0.69    | 1.38 (0.80-2.40)      | 0.24    | 1.91 (0.89-4.13)          | 0.09    |
| <b>Annual household income</b>                    |                       |         |                           |         |                       |         |                           |         |
| • Bottom third (ref)                              | -                     |         | -                         |         | -                     |         | -                         |         |
| • Middle third                                    | 1.50 (1.12-2.01)      | <0.01   | 1.92 (0.83-4.43)          | 0.12    | 1.42 (1.00-2.01)      | <0.05   | 1.07 (0.41-2.81)          | 0.88    |
| • Top third                                       | 1.96 (1.36-2.81)      | <0.001  | 3.20 (0.84-12.15)         | 0.08    | 1.67 (1.15-2.43)      | <0.01   | 2.54 (0.77-8.41)          | 0.12    |
| <b>Adults ≥18 years living in the household</b>   |                       |         |                           |         |                       |         |                           |         |
| • ≤ 2 (ref)                                       | -                     |         | -                         |         | -                     |         | -                         |         |
| • > 2                                             | 0.52 (0.41-0.66)      | <0.001  | 1.04 (0.44-2.43)          | 0.93    | 0.73 (0.56-0.95)      | 0.02    | 0.46 (0.21-1.03)          | 0.06    |
| <b>Children ≤18 years living in the household</b> |                       |         |                           |         |                       |         |                           |         |
| • ≤ 2 (ref)                                       | -                     |         | -                         |         | -                     |         | -                         |         |
| • > 2                                             | 0.69 (0.44-1.08)      | 0.12    |                           |         | 0.84 (0.52-1.37)      | 0.48    |                           |         |
| <b>Gender Inequality Index</b>                    |                       |         |                           |         |                       |         |                           |         |
| • High GII (ref)                                  | -                     |         | -                         |         | -                     |         | -                         |         |
| • Low/Medium GII                                  | 2.29 (1.88-2.78)      | <0.001  | 2.11 (0.95-4.71)          | 0.07    | 1.37 (1.09-1.72)      | <0.01   | 0.57 (0.25-1.32)          | 0.18    |
| <b>Geographic Regions</b>                         |                       |         |                           |         |                       |         |                           |         |
| • Europe                                          | 1.91 (1.49-2.43)      | <0.001  |                           |         | 1.28 (0.98-1.67)      | 0.06    |                           |         |
| • North America                                   | 2.93 (2.31-3.72)      | <0.001  |                           |         | 1.87 (1.42-2.46)      | <0.001  |                           |         |
| • Others (ref)                                    | -                     |         |                           |         | -                     |         |                           |         |
| <b>Psychosocial characteristics</b>               |                       |         |                           |         |                       |         |                           |         |
| Depressive disorder                               | 0.73 (0.52-1.02)      | 0.07    | 0.74 (0.20-2.71)          | 0.65    | 0.63 (0.42-0.95)      | <0.05   | 0.72 (0.18-2.98)          | 0.66    |
| Anxiety disorder                                  | 0.90 (0.68-1.18)      | 0.45    | 0.98 (0.32-2.96)          | 0.97    | 0.71 (0.34-1.44)      | 0.05    | 2.51 (0.47-13.38)         | 0.28    |

Note: In the multivariable model, geographic regions variable dropped due to collinearity with GII. Number of children in household variables dropped due to collinearity with number of adults in the household variable.

**Table 1b.** Association between gender-related variables and adoption of physical distancing, by sex

|                                                   | Physical distancing   |         |                           |         |                       |         |                           |         |
|---------------------------------------------------|-----------------------|---------|---------------------------|---------|-----------------------|---------|---------------------------|---------|
|                                                   | Female                |         |                           |         | Male                  |         |                           |         |
|                                                   | Bivariate OR (95% CI) | p-value | Multivariate aOR (95% CI) | p-value | Bivariate OR (95% CI) | p-value | Multivariate aOR (95% CI) | p-value |
| <b>Sociodemographic characteristics</b>           |                       |         |                           |         |                       |         |                           |         |
| <b>Age distribution</b>                           |                       |         |                           |         |                       |         |                           |         |
| • Up to 25 (ref)                                  | -                     |         | -                         |         | -                     |         | -                         |         |
| • 26-50                                           | 1.10 (1.03-1.18)      | <0.01   | 2.01 (1.54-2.63)          | <0.001  | 1.11 (0.99-1.25)      | 0.05    | 2.53 (1.53-4.21)          | <0.001  |
| • 51 and older                                    | 1.60 (1.47-1.73)      | <0.001  | 3.57 (2.72-4.68)          | <0.001  | 1.41 (1.24-1.58)      | <0.001  | 3.99 (2.47-6.46)          | <0.001  |
| <b>Education level</b>                            |                       |         |                           |         |                       |         |                           |         |
| • Low level (ref)                                 | -                     |         | -                         |         | -                     |         | -                         |         |
| • High level                                      | 1.19 (1.11-1.27)      | <0.001  | 1.39 (1.13-1.74)          | <0.01   | 1.21 (1.09-1.34)      | <0.001  | 0.87 (0.61-1.25)          | 0.45    |
| <b>Work status</b>                                |                       |         |                           |         |                       |         |                           |         |
| • Unemployed (ref)                                | -                     |         | -                         |         | -                     |         | -                         |         |
| • Employed                                        | 0.55 (0.48-0.62)      | <0.001  | 0.39 (0.32-0.49)          | <0.001  | 0.48 (0.38-0.59)      | <0.001  | 0.38 (0.27-0.52)          | <0.001  |
| <b>Annual household income</b>                    |                       |         |                           |         |                       |         |                           |         |
| • Bottom third (ref)                              | -                     |         | -                         |         | -                     |         | -                         |         |
| • Middle third                                    | 1.26 (0.99-1.60)      | 0.05    | 1.26 (0.99-1.59)          | 0.06    | 1.24 (0.89-1.73)      | 0.19    | 1.54 (1.01-2.32)          | <0.05   |
| • Top third                                       | 1.90 (1.41-2.56)      | <0.001  | 1.53 (1.17-2.01)          | <0.01   | 1.71 (1.19-2.45)      | <0.01   | 2.13 (1.36-3.35)          | <0.01   |
| <b>Adults ≥18 years living in the household</b>   |                       |         |                           |         |                       |         |                           |         |
| • ≤ 2 (ref)                                       | -                     |         | -                         |         | -                     |         | -                         |         |
| • > 2                                             | 0.65 (0.60-0.69)      | <0.001  | 0.89 (0.72-1.09)          | 0.27    | 0.61 (0.55-0.67)      | <0.001  | 0.66 (0.47-0.92)          | <0.05   |
| <b>Children ≤18 years living in the household</b> |                       |         |                           |         |                       |         |                           |         |
| • ≤ 2 (ref)                                       | -                     |         | -                         |         | -                     |         | -                         |         |
| • > 2                                             | 0.79 (0.69-0.92)      | <0.01   |                           |         | 0.94 (0.78-1.15)      | 0.56    |                           |         |
| <b>Gender Inequality Index</b>                    |                       |         |                           |         |                       |         |                           |         |
| • High GII (ref)                                  | -                     |         | -                         |         | -                     |         | -                         |         |
| • Low/Medium GII                                  | 0.99 (0.94-1.06)      | 0.95    | 0.72 (0.58-0.88)          | <0.01   | 1.23 (1.13-1.34)      | <0.001  | 0.87 (0.64-1.19)          | 0.39    |
| <b>Geographic Regions</b>                         |                       |         |                           |         |                       |         |                           |         |
| • Europe                                          | 1.16 (1.09-1.24)      | <0.001  |                           |         | 1.29 (1.17-1.43)      | <0.001  |                           |         |
| • North America                                   | 2.26 (2.12-2.41)      | <0.001  |                           |         | 2.26 (2.04-2.49)      | <0.001  |                           |         |
| • Others (ref)                                    | -                     |         |                           |         | -                     |         |                           |         |
| <b>Psychosocial characteristics</b>               |                       |         |                           |         |                       |         |                           |         |
| Depressive disorder                               | 1.16 (1.05-1.29)      | <0.01   | 1.07 (0.78-1.48)          | 0.66    | 1.00 (0.84-1.19)      | 0.96    | 0.86 (0.49-1.50)          | 0.60    |
| Anxiety disorder                                  | 1.21 (1.12-1.31)      | <0.001  | 1.03 (0.79-1.32)          | 0.84    | 1.00 (0.95-1.27)      | 0.19    | 1.40 (0.85-2.31)          | 0.18    |

Note: In the multivariable model, geographic regions variable dropped due to collinearity with GII. Number of children in household variables dropped due to collinearity with number of adults in the household variable.
